# Supplementary material for: Colorimetric Sensor Based on Hydroxypropyl Cellulose for Wide Temperature Sensing Range
Source: MDPI journal article supplement (doi:10.3390/s22030886), 2022-01-24
Supplement: s1 [file s1]

## Supplementary materials

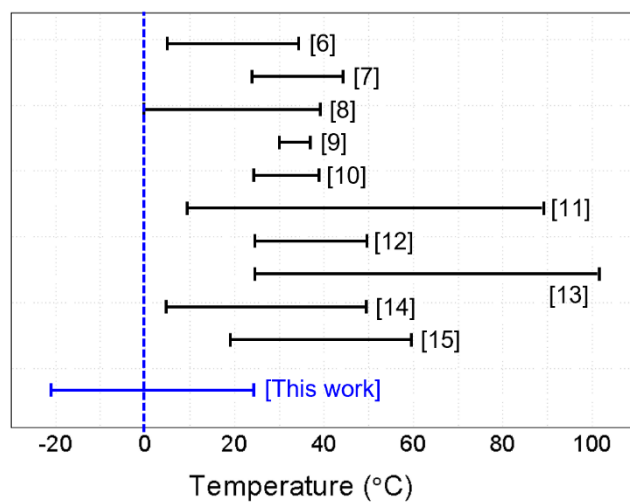

**Figure S1.** Temperature sensing ranges of various colorimetric sensors.

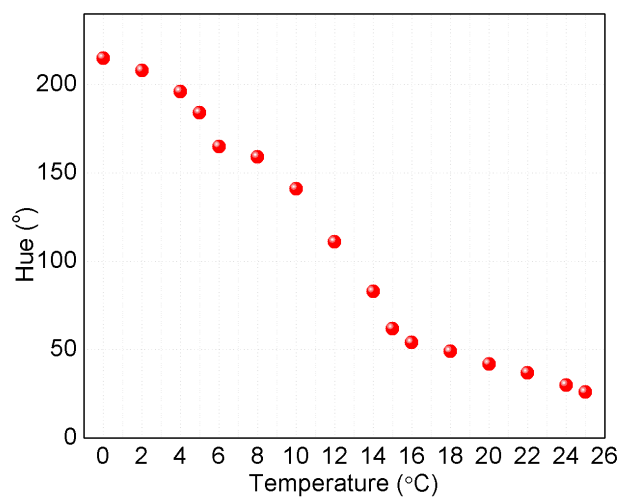

**Figure S2.** Color response of the HPC colorimetric sensor as a function of temperature depicted in the HSV color space.

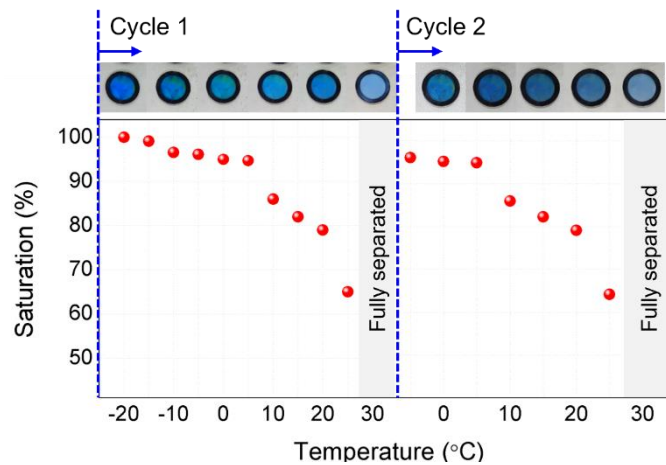

**Figure S3.** Repeatability test of the ethylene glycol-modulated (30 wt.%) HPC colorimetric sensor.
